# Supplementary material for: The impact of chemical structure on the formation of the medium-range order and dynamical properties of selected antifungal APIs
Source: Royal Society of Chemistry journal article supplement (doi:10.1039/d0cp02332a), 2020-01-01
Supplement: d0cp02332a1.pdf [file d0cp02332a1.pdf]

## SUPPLEMENTARY INFORMATION

### The impact of chemical structure on the formation of the medium-range order and dynamical properties of selected antifungal APIs

Dawid Heczko<sup>1,\*</sup>, Karolina Jurkiewicz<sup>2,3</sup>, Magdalena Tarnacka<sup>2,3</sup>, Joanna Grelska<sup>2,3</sup>, Roman Wrzalik<sup>2,3</sup>, Kamil Kamiński<sup>2,3</sup>, Marian Paluch<sup>2,3</sup>, Ewa Kamińska<sup>1\*</sup>

<sup>1</sup> Department of Pharmacognosy and Phytochemistry, Faculty of Pharmaceutical Sciences in Sosnowiec, Medical University of Silesia in Katowice, ul. Jagiellońska 4, 41-200 Sosnowiec, Poland

<sup>2</sup> Institute of Physics, University of Silesia in Katowice, 75 Pułku Piechoty 1, 41-500 Chorzów, Poland

<sup>3</sup> Silesian Center for Education and Interdisciplinary Research, 75 Pułku Piechoty 1A, 41-500 Chorzów, Poland

#### Density Functional Theory (DFT) calculations

The density functional theory was used for geometry optimization and determination of dipole moments. The calculations were performed using the B3LYP/6-311G(d,p) functional combined with the aug-cc-pVDZ basis set, within the Gaussian03 software package. The geometry of the optimized lowest-energy conformation for terconazole (TER) and ketoconazole (KET) is shown in Fig. S1 a and b, respectively.

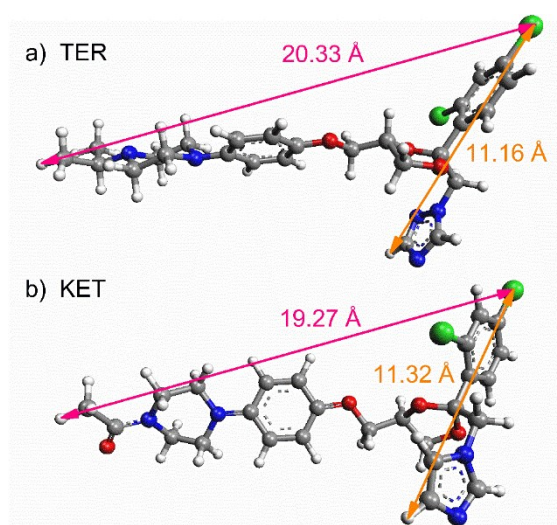

**Fig. S1.** Optimized geometry of (a) TER and (b) KET molecules.

## Dielectric data

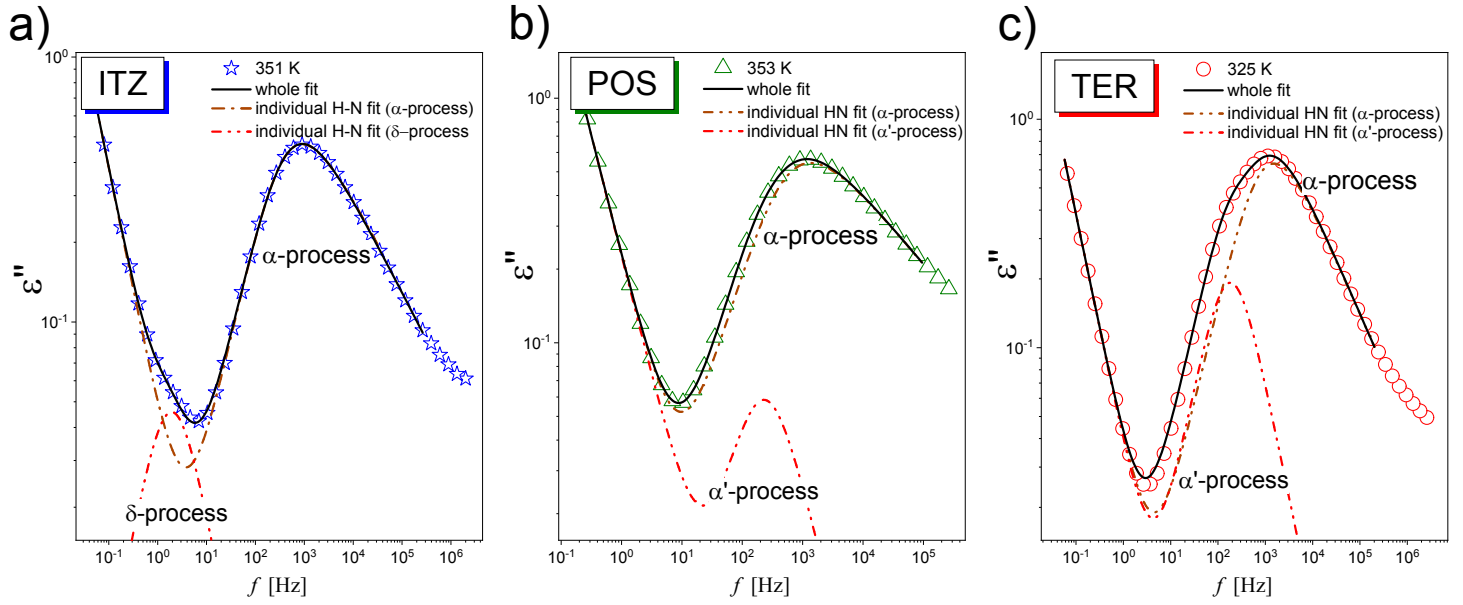

**Fig. S2.** Dielectric spectra of ITZ (a), POS (b), and (TER) measured at ambient pressure and indicated temperatures, together with the fits constructed from the superposition of two Havriliak-Negami (HN) functions with the additional conductivity term- Eq. (1) (black solid lines). In addition, the individual HN fits describing the  $\delta/\alpha'$ - and  $\alpha$ -relaxation processes (red and brown dash-dotted lines, respectively) are presented.

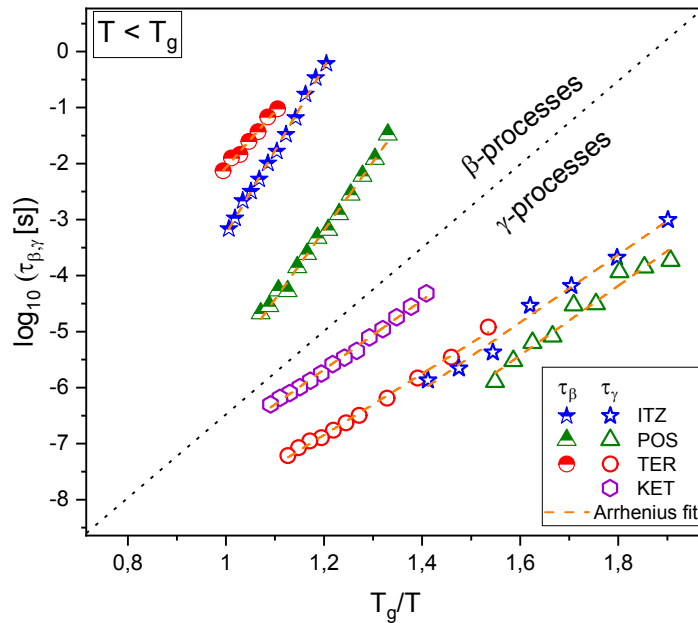

**Fig. S3.** Temperature dependences of the secondary  $\beta$ - (half-filled symbols) and  $\gamma$ -relaxation times (open symbols). Data for ITZ, POS and KET were taken from Ref. 1.

The values of  $\tau_\beta$  and  $\tau_\gamma$  for TER were determined from the analyses of dielectric spectra shown in Fig. 4c (main manuscript) with the use of superposition of two HN functions (Eq. 1). The same fitting procedure was applied in the case of ITZ and POS.<sup>1</sup> In the case of KET, one HN function was used to fit the data measured below the  $T_g$ .<sup>1</sup>

The temperature dependences of  $\tau_\beta$  and  $\tau_\gamma$  for TER (as for other APIs<sup>1</sup>) were analyzed with the use of Arrhenius equation:

$$\tau_x = \tau_\infty^x \exp\left(\frac{E_x}{RT}\right) \quad x = \beta, \gamma \quad (\text{S1})$$

where R is a gas constant.

## REFERENCES

- 
- <sup>1</sup> D. Heczko, E. Kamińska, K. Jurkiewicz, M. Tarnacka, K. Merkel, K. Kamiński and M. Paluch, *Mol. Liq.*, 2020, **307**, 112959.
